# Supplementary material
Source: Springer Nature journal article supplement (https://www.springermedizin.de/resource/supplementary/13049_2013_828_MOESM2_ESM.pdf/9667242)

Hypothermia (circle)

n = 244

Hypothermia only

n = 202

n = 24

n = 18

0

Frostbite only

n = 80

1

Drowning only n = 37

n = 56

Frostbite (circle)

n = 105

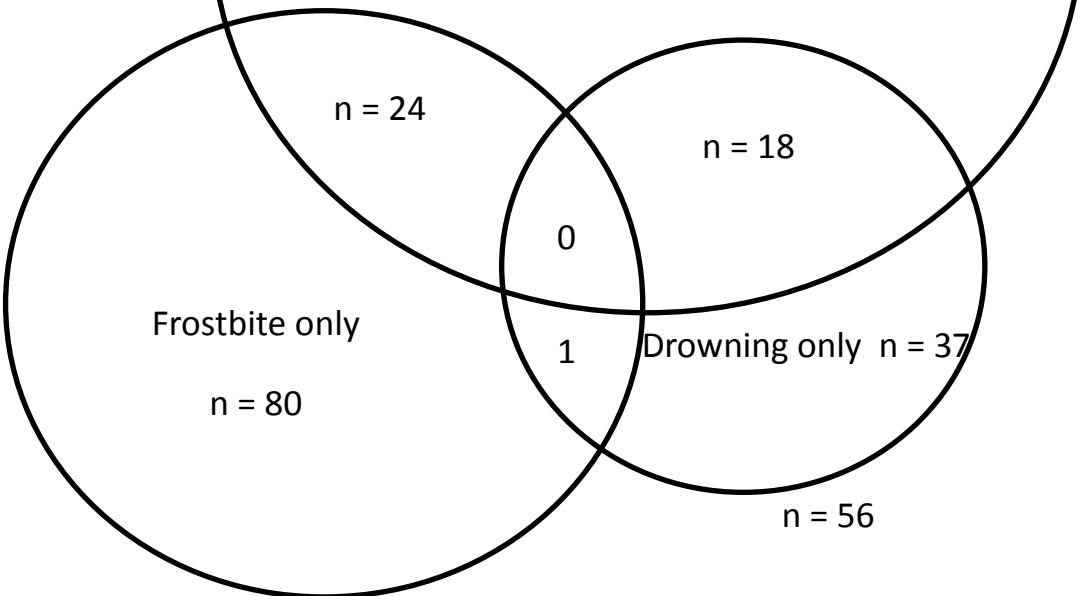

Supplement: MOESM2 [file 9667242]
